# Supplementary material for: Assessment of Soy Protein Acid Hydrolysate—Xanthan Gum Mixtures on the Stability, Disperse and Rheological Properties of Oil-in-Water Emulsions
Source: MDPI journal article supplement (doi:10.3390/polym15092195), 2023-05-05
Supplement: s1 [file s1]

**Table S1.** The creaming index values,  $H$  (%), for emulsions containing I) 3 or II) 5% (w/w) of SPAH and various concentrations of XG, during various storage periods,  $t$  (h): A) 0%, B) 0.1%, C) 0.3%, D) 0.4%, E) 0.5% (w/w).

| $t$ (h) | $H$ (%) |      |      |       |       |   |
|---------|---------|------|------|-------|-------|---|
|         | A       | B    | C    | D     | E     | F |
| I       |         |      |      |       |       |   |
| 24      | 57.1    | 55.1 | 35.4 | 0     | 0     | 0 |
| 48      | 57.1    | 55.1 | 39.6 | 2.41  | 0     | 0 |
| 72      | 57.1    | 55.1 | 43.7 | 4.82  | 0     | 0 |
| 96      | 57.1    | 55.1 | 45.8 | 7.23  | 0     | 0 |
| 120     | 57.1    | 55.1 | 47.9 | 9.64  | 0     | 0 |
| 144     | 57.1    | 55.1 | 49.0 | 12.0  | 0     | 0 |
| 168     | 57.1    | 55.1 | 50.0 | 14.5  | 0     | 0 |
| 192     | 57.1    | 55.1 | 50.0 | 15.7  | 0     | 0 |
| 216     | 57.1    | 55.1 | 50.0 | 16.9  | 0.67  | 0 |
| 240     | 57.1    | 55.1 | 50.5 | 18.1  | 0.67  | 0 |
| 264     | 57.1    | 55.1 | 50.5 | 19.3  | 0.67  | 0 |
| 288     | 57.1    | 55.1 | 51.0 | 20.5  | 1.33  | 0 |
| 312     | 57.1    | 55.1 | 51.0 | 20.5  | 1.33  | 0 |
| 336     | 57.1    | 55.1 | 51.0 | 21.1  | 1.33  | 0 |
| II      |         |      |      |       |       |   |
| 24      | 51.9    | 51.0 | 30.6 | 0     | 0     | 0 |
| 48      | 51.9    | 51.0 | 35.7 | 0     | 0     | 0 |
| 72      | 51.9    | 51.0 | 38.8 | 0.625 | 0     | 0 |
| 96      | 51.9    | 51.0 | 39.8 | 1.25  | 0     | 0 |
| 120     | 51.9    | 51.0 | 40.8 | 1.87  | 0     | 0 |
| 144     | 51.9    | 51.0 | 41.8 | 2.50  | 0     | 0 |
| 168     | 51.9    | 51.0 | 42.9 | 3.12  | 0     | 0 |
| 192     | 51.9    | 51.0 | 43.9 | 4.37  | 0     | 0 |
| 216     | 51.9    | 51.0 | 44.9 | 6.25  | 0     | 0 |
| 240     | 51.9    | 51.0 | 44.9 | 8.75  | 0     | 0 |
| 264     | 51.9    | 51.0 | 46.9 | 10.0  | 0     | 0 |
| 288     | 51.9    | 51.0 | 47.9 | 11.2  | 0     | 0 |
| 312     | 51.9    | 51.0 | 47.9 | 11.2  | 0     | 0 |
| 336     | 51.9    | 51.0 | 48.5 | 13.7  | 0.735 | 0 |
